# Supplementary material for: Pyrolysis of Chilean Southern Lignocellulosic Biomasses: Isoconversional Kinetics Analysis and Pyrolytic Products Distribution
Source: MDPI journal article supplement (doi:10.3390/polym15122698), 2023-06-16
Supplement: s1 [file s1]

*Supplementary Materials*

# Pyrolysis of Chilean Southern Lignocellulosic Biomasses: Isoconversional Kinetics Analysis and Pyrolytic Products Distribution

Cristian Cerda-Barrera <sup>1</sup>, Kevin J. Fernández-Andrade <sup>2,3</sup> and Serguei Alejandro-Martín <sup>2,3,\*</sup>

<sup>1</sup> Department of Industrial Processes, Universidad Católica de Temuco, 4780000 Temuco, Chile; ccerda@uct.cl

<sup>2</sup> Laboratory of Gas Chromatography and Analytical Pyrolysis, Universidad del Bío-Bío, 4030000 Concepción, Chile; kevin.fernandez2101@alumnos.ubiobio.cl

<sup>3</sup> Wood Engineering Department, Engineering Faculty, Universidad del Bío-Bío, 4030000 Concepción, Chile

\* Correspondence: salejandro@ubiobio.cl

## Supplementary Materials

**Table S1.** Different reaction models used for master plot construction and calculation of the compensation effect.

| i  | Title 2                     | Code | $f(\alpha)$                                    | $g(\alpha)$                             |
|----|-----------------------------|------|------------------------------------------------|-----------------------------------------|
| 1  | Power law                   | P4   | $4\alpha^{3/4}$                                | $\alpha^{1/4}$                          |
| 2  | Power law                   | P3   | $3\alpha^{2/3}$                                | $\alpha^{1/3}$                          |
| 3  | Power law                   | P2   | $2\alpha^{1/2}$                                | $\alpha^{1/2}$                          |
| 4  | Power law                   | P2/3 | $2/3\alpha^{-1/2}$                             | $\alpha^{3/2}$                          |
| 5  | One-dimensional diffusion   | D1   | $1/2\alpha^{-1}$                               | $\alpha^2$                              |
| 6  | Mampel (first order)        | F1   | $1 - \alpha$                                   | $\ln(1 - \alpha)$                       |
| 7  | Avrami-Erofeev              | A4   | $4(1 - \alpha)[- \ln(1 - \alpha)]^{3/4}$       | $[- \ln(1 - \alpha)]^{1/4}$             |
| 8  | Avrami-Erofeev              | A3   | $3(1 - \alpha)[- \ln(1 - \alpha)]^{2/3}$       | $[- \ln(1 - \alpha)]^{1/3}$             |
| 9  | Avrami-Erofeev              | A2   | $2(1 - \alpha)[- \ln(1 - \alpha)]^{1/2}$       | $[- \ln(1 - \alpha)]^{1/2}$             |
| 10 | Three-dimensional diffusion | D3   | $3/2(1 - \alpha)^{2/3}[1 - (1 - \alpha)]^{-1}$ | $[1 - (1 - \alpha)^{1/3}]^2$            |
| 11 | Contracting sphere          | R3   | $3(1 - \alpha)^{2/3}$                          | $1 - (1 - \alpha)^{1/3}$                |
| 12 | Contracting cylinder        | R2   | $2(1 - \alpha)^{1/2}$                          | $1 - (1 - \alpha)^{1/3}$                |
| 13 | Two-dimensional diffusion   | D2   | $[- \ln(1 - \alpha)]^{-1}$                     | $(1 - \alpha) \ln(1 - \alpha) + \alpha$ |

**Table S2.** Kissinger kinetic parameters for biomass pyrolysis.

| Sample | $E_a$ [kJ mol <sup>-1</sup> ] | $A_0$ [min <sup>-1</sup> ] | $R^2$ |
|--------|-------------------------------|----------------------------|-------|
| PR     | 128.02                        | $1.28 \times 10^{10}$      | 0.993 |
| NO     | 124.12                        | $5.92 \times 10^6$         | 0.994 |
| EN     | 132.27                        | $5.59 \times 10^7$         | 0.983 |
| EC     | 126.68                        | $9.95 \times 10^6$         | 0.983 |

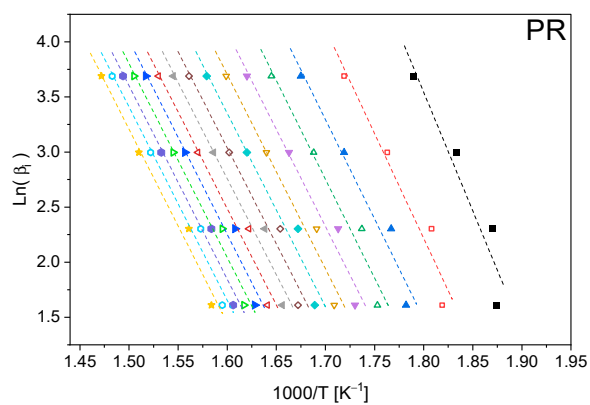

(a)

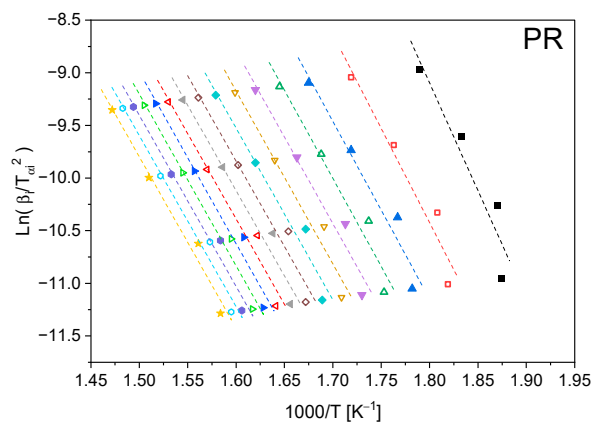

(b)

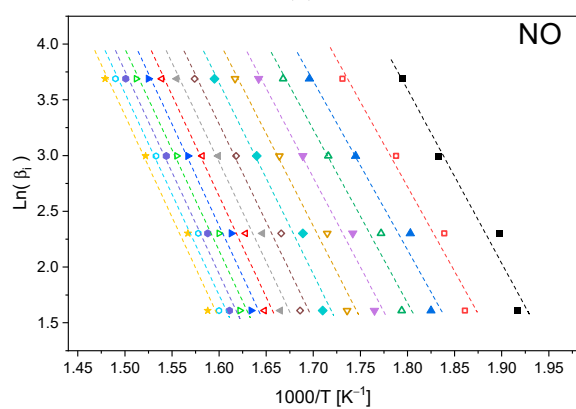

(c)

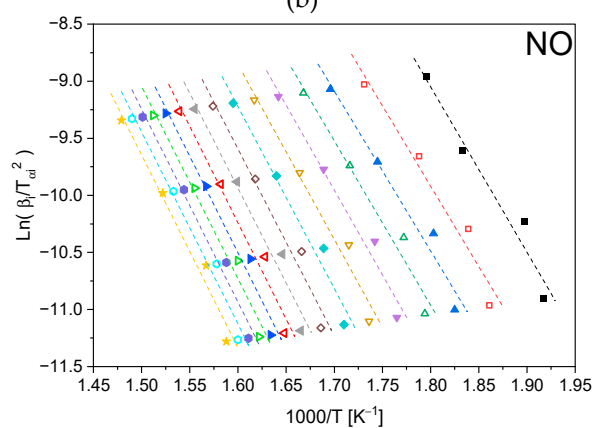

(d)

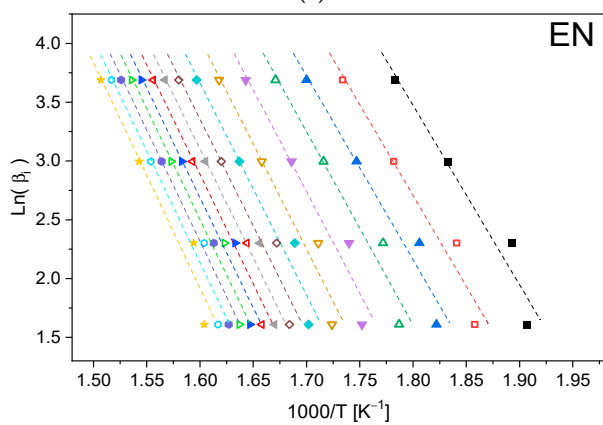

(e)

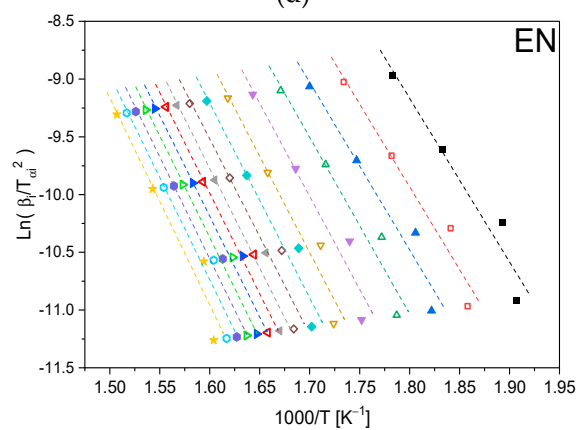

(f)

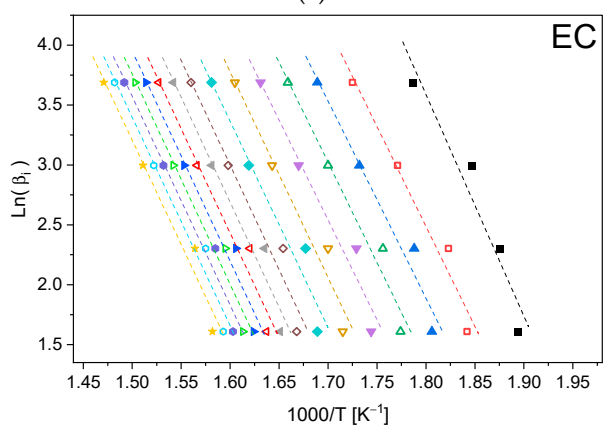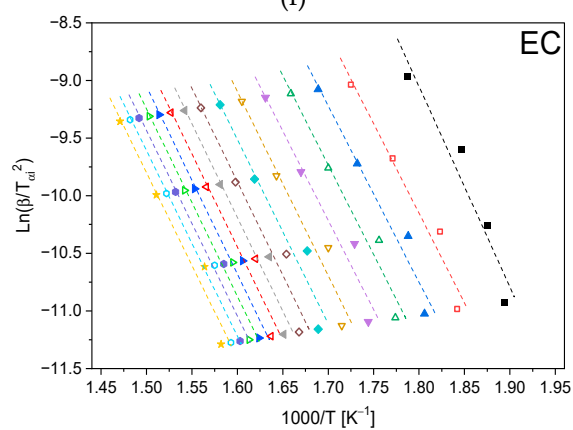

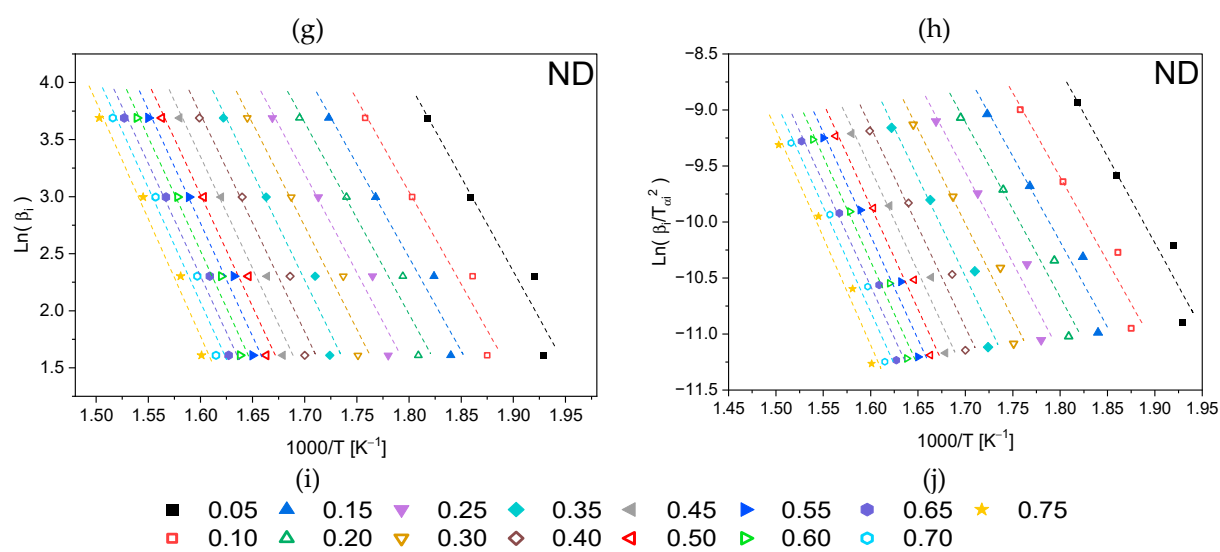

**Figure S1.** FWO (left) and KAS (right) plots for biomass samples for different conversion values.

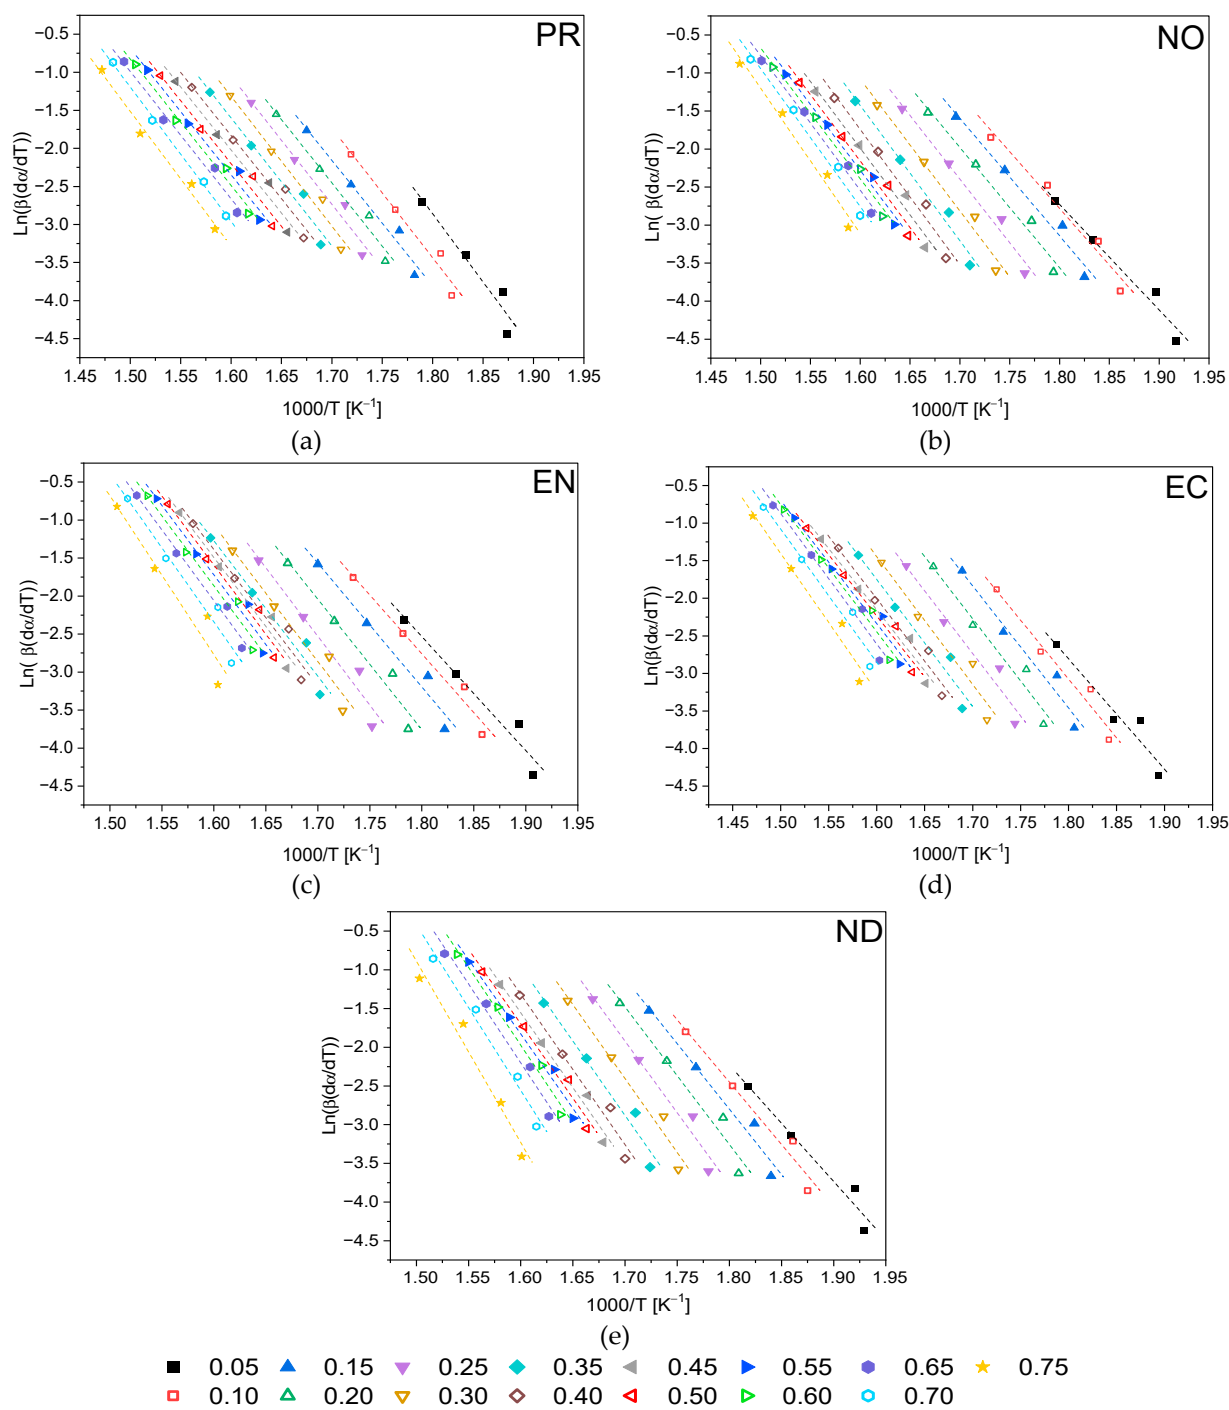

Figure S2. FWO (left) and KAS (right) plots for biomass samples for different conversion values.

**Table S3.** Activation energy and r-squared estimated by the three isoconversional methods (FWO, KAS, FR) for Pine (PR) decomposition.

| $\alpha$          | FWO                                    |                | KAS                                    |                | FR                                     |                |
|-------------------|----------------------------------------|----------------|----------------------------------------|----------------|----------------------------------------|----------------|
|                   | E <sub>a</sub> [kJ mol <sup>-1</sup> ] | R <sup>2</sup> | E <sub>a</sub> [kJ mol <sup>-1</sup> ] | R <sup>2</sup> | E <sub>a</sub> [kJ mol <sup>-1</sup> ] | R <sup>2</sup> |
| 0.05              | 170.28                                 | 0.9527         | 170.05                                 | 0.9479         | 148.76                                 | 0.9622         |
| 0.10              | 150.36                                 | 0.9731         | 148.73                                 | 0.9700         | 141.77                                 | 0.9820         |
| 0.15              | 142.62                                 | 0.9801         | 140.43                                 | 0.9773         | 137.46                                 | 0.9854         |
| 0.20              | 141.61                                 | 0.9819         | 139.18                                 | 0.9794         | 138.27                                 | 0.9863         |
| 0.25              | 139.35                                 | 0.9832         | 136.64                                 | 0.9806         | 139.87                                 | 0.9833         |
| 0.30              | 139.46                                 | 0.9849         | 136.63                                 | 0.9826         | 141.75                                 | 0.9854         |
| 0.35              | 138.66                                 | 0.9833         | 135.70                                 | 0.9807         | 139.87                                 | 0.9831         |
| 0.40              | 137.94                                 | 0.9846         | 134.84                                 | 0.9822         | 138.06                                 | 0.9862         |
| 0.45              | 137.94                                 | 0.9846         | 134.69                                 | 0.9822         | 137.83                                 | 0.9854         |
| 0.50              | 138.34                                 | 0.9860         | 135.03                                 | 0.9838         | 137.54                                 | 0.9858         |
| 0.55              | 139.11                                 | 0.9875         | 135.76                                 | 0.9855         | 137.99                                 | 0.9882         |
| 0.60              | 139.06                                 | 0.9899         | 135.63                                 | 0.9882         | 138.14                                 | 0.9925         |
| 0.65              | 138.66                                 | 0.9897         | 135.15                                 | 0.9880         | 139.12                                 | 0.9922         |
| 0.70              | 138.67                                 | 0.9897         | 135.07                                 | 0.9880         | 146.79                                 | 0.9989         |
| 0.75              | 138.95                                 | 0.9908         | 135.28                                 | 0.9892         | 147.34                                 | 0.9928         |
| <b>Average</b>    | 142.07                                 |                | 139.25                                 |                | 140.70                                 |                |
| <b>%Variation</b> | 24.89                                  | Multi-Step     | 23.22                                  | Multi-Step     | 8.04                                   | Single-Step    |

**Table S4.** Activation energy and r-squared estimated by the three isoconversional methods (FWO, KAS, FR) for Oak (NO) decomposition.

| $\alpha$          | FWO                                    |                | KAS                                    |                | FR                                     |                |
|-------------------|----------------------------------------|----------------|----------------------------------------|----------------|----------------------------------------|----------------|
|                   | E <sub>a</sub> [kJ mol <sup>-1</sup> ] | R <sup>2</sup> | E <sub>a</sub> [kJ mol <sup>-1</sup> ] | R <sup>2</sup> | E <sub>a</sub> [kJ mol <sup>-1</sup> ] | R <sup>2</sup> |
| 0.05              | 123.06                                 | 0.9828         | 120.48                                 | 0.9802         | 115.38                                 | 0.98167        |
| 0.10              | 120.11                                 | 0.9833         | 117.09                                 | 0.9805         | 123.96                                 | 0.9830         |
| 0.15              | 119.68                                 | 0.9860         | 116.46                                 | 0.9836         | 128.33                                 | 0.9882         |
| 0.20              | 122.87                                 | 0.9866         | 119.66                                 | 0.9844         | 131.46                                 | 0.9887         |
| 0.25              | 126.84                                 | 0.9885         | 123.66                                 | 0.9865         | 139.09                                 | 0.9891         |
| 0.30              | 130.70                                 | 0.9867         | 127.62                                 | 0.9845         | 144.08                                 | 0.9883         |
| 0.35              | 135.63                                 | 0.9877         | 132.62                                 | 0.9857         | 147.93                                 | 0.9897         |
| 0.40              | 138.98                                 | 0.9870         | 136.01                                 | 0.9850         | 147.79                                 | 0.9867         |
| 0.45              | 141.25                                 | 0.9859         | 138.20                                 | 0.9837         | 146.02                                 | 0.9861         |
| 0.50              | 143.28                                 | 0.9877         | 140.31                                 | 0.9858         | 145.43                                 | 0.9890         |
| 0.55              | 143.72                                 | 0.9892         | 140.65                                 | 0.9875         | 144.31                                 | 0.9917         |
| 0.60              | 143.20                                 | 0.9901         | 140.02                                 | 0.9885         | 142.97                                 | 0.9923         |
| 0.65              | 143.92                                 | 0.9912         | 140.71                                 | 0.9898         | 147.31                                 | 0.9938         |
| 0.70              | 143.20                                 | 0.9901         | 139.90                                 | 0.9885         | 150.78                                 | 0.9926         |
| 0.75              | 144.04                                 | 0.9890         | 140.67                                 | 0.9872         | 158.98                                 | 0.9892         |
| <b>Average</b>    | 134.70                                 |                | 131.60                                 |                | 140.92                                 |                |
| <b>%Variation</b> | 18.09                                  | Single-Step    | 18.43                                  | Single-Step    | 30.94                                  | Multi-Step     |

**Table S5.** Activation energy and r-squared estimated by the three isoconversional methods (FWO, KAS, FR) for Eucalyptus (EN) decomposition.

| $\alpha$          | FWO                                    |                   | KAS                                    |                   | FR                                     |                   |
|-------------------|----------------------------------------|-------------------|----------------------------------------|-------------------|----------------------------------------|-------------------|
|                   | E <sub>a</sub> [kJ mol <sup>-1</sup> ] | R <sup>2</sup>    | E <sub>a</sub> [kJ mol <sup>-1</sup> ] | R <sup>2</sup>    | E <sub>a</sub> [kJ mol <sup>-1</sup> ] | R <sup>2</sup>    |
| 0.05              | 120.59                                 | 0.9752            | 117.86                                 | 0.9714            | 124.85                                 | 0.9763            |
| 0.10              | 122.10                                 | 0.9801            | 119.16                                 | 0.9769            | 128.70                                 | 0.9858            |
| 0.15              | 123.54                                 | 0.9790            | 120.54                                 | 0.9757            | 135.45                                 | 0.9813            |
| 0.20              | 129.86                                 | 0.9786            | 126.99                                 | 0.9754            | 142.70                                 | 0.9786            |
| 0.25              | 136.62                                 | 0.9748            | 133.91                                 | 0.9710            | 150.36                                 | 0.9740            |
| 0.30              | 141.04                                 | 0.9773            | 138.45                                 | 0.9741            | 149.33                                 | 0.9760            |
| 0.35              | 142.65                                 | 0.9776            | 140.06                                 | 0.9743            | 148.30                                 | 0.9780            |
| 0.40              | 143.33                                 | 0.9759            | 140.60                                 | 0.9724            | 149.10                                 | 0.9775            |
| 0.45              | 146.10                                 | 0.9799            | 143.41                                 | 0.9770            | 151.01                                 | 0.9802            |
| 0.50              | 147.38                                 | 0.9800            | 144.73                                 | 0.9772            | 151.12                                 | 0.9836            |
| 0.55              | 147.83                                 | 0.9802            | 145.06                                 | 0.9772            | 152.14                                 | 0.9830            |
| 0.60              | 149.15                                 | 0.9803            | 146.40                                 | 0.9775            | 153.21                                 | 0.9832            |
| 0.65              | 149.59                                 | 0.9804            | 146.89                                 | 0.9776            | 154.66                                 | 0.9902            |
| 0.70              | 149.93                                 | 0.9787            | 147.14                                 | 0.9756            | 161.97                                 | 0.9759            |
| 0.75              | 151.72                                 | 0.9733            | 148.94                                 | 0.9694            | 173.92                                 | 0.9575            |
| <b>Average</b>    | 140.10                                 |                   | 137.34                                 |                   | 148.45                                 |                   |
| <b>%Variation</b> | 22.22                                  | <b>Multi-Step</b> | 22.63                                  | <b>Multi-Step</b> | 33.05                                  | <b>Multi-Step</b> |

**Table S6.** Activation energy and r-squared estimated by the three isoconversional methods (FWO, KAS, FR) for Coigüe (ND) decomposition.

| $\alpha$          | FWO                                    |                   | KAS                                    |                   | FR                                     |                   |
|-------------------|----------------------------------------|-------------------|----------------------------------------|-------------------|----------------------------------------|-------------------|
|                   | E <sub>a</sub> [kJ mol <sup>-1</sup> ] | R <sup>2</sup>    | E <sub>a</sub> [kJ mol <sup>-1</sup> ] | R <sup>2</sup>    | E <sub>a</sub> [kJ mol <sup>-1</sup> ] | R <sup>2</sup>    |
| 0.05              | 130.38                                 | 0.9684            | 128.28                                 | 0.9640            | 125.12                                 | 0.9779            |
| 0.10              | 127.79                                 | 0.9768            | 125.31                                 | 0.9734            | 133.87                                 | 0.9813            |
| 0.15              | 129.28                                 | 0.9801            | 126.73                                 | 0.9771            | 140.51                                 | 0.9832            |
| 0.20              | 132.58                                 | 0.9790            | 130.02                                 | 0.9758            | 147.59                                 | 0.9804            |
| 0.25              | 136.55                                 | 0.9796            | 134.04                                 | 0.9767            | 153.86                                 | 0.9826            |
| 0.30              | 142.69                                 | 0.9791            | 140.35                                 | 0.9761            | 158.82                                 | 0.9830            |
| 0.35              | 149.01                                 | 0.9800            | 146.84                                 | 0.9771            | 159.76                                 | 0.9802            |
| 0.40              | 150.76                                 | 0.9800            | 148.51                                 | 0.9772            | 161.68                                 | 0.9844            |
| 0.45              | 155.03                                 | 0.9824            | 152.86                                 | 0.9799            | 161.13                                 | 0.9891            |
| 0.50              | 155.11                                 | 0.9855            | 152.90                                 | 0.9835            | 159.94                                 | 0.9893            |
| 0.55              | 156.38                                 | 0.9684            | 153.39                                 | 0.9856            | 159.73                                 | 0.9909            |
| 0.60              | 157.57                                 | 0.9875            | 155.32                                 | 0.9857            | 167.21                                 | 0.9911            |
| 0.65              | 156.05                                 | 0.9870            | 153.66                                 | 0.9852            | 169.43                                 | 0.9900            |
| 0.70              | 158.25                                 | 0.9867            | 155.88                                 | 0.9848            | 177.79                                 | 0.9892            |
| 0.75              | 162.25                                 | 0.9886            | 159.95                                 | 0.9870            | 194.81                                 | 0.9822            |
| <b>Average</b>    | 144.91                                 |                   | 144.27                                 |                   | 158.08                                 |                   |
| <b>%Variation</b> | 23.78                                  | <b>Multi-Step</b> | 24.01                                  | <b>Multi-Step</b> | 44.09                                  | <b>Multi-Step</b> |

**Table S7.** Activation energy and r-squared estimated by the three isoconversional methods (FWO, KAS, FR) for Ulmo (EC) decomposition.

| $\alpha$          | FWO                           |                    | KAS                           |                    | FR                            |                   |
|-------------------|-------------------------------|--------------------|-------------------------------|--------------------|-------------------------------|-------------------|
|                   | $E_a$ [kJ mol <sup>-1</sup> ] | R <sup>2</sup>     | $E_a$ [kJ mol <sup>-1</sup> ] | R <sup>2</sup>     | $E_a$ [kJ mol <sup>-1</sup> ] | R <sup>2</sup>    |
| 0.05              | 146.24                        | 0.9652             | 144.78                        | 0.9609             | 122.02                        | 0.9572            |
| 0.10              | 131.74                        | 0.9845             | 129.25                        | 0.9822             | 130.10                        | 0.9808            |
| 0.15              | 130.10                        | 0.9832             | 127.39                        | 0.9806             | 135.16                        | 0.9802            |
| 0.20              | 132.13                        | 0.9835             | 129.34                        | 0.9809             | 137.70                        | 0.9782            |
| 0.25              | 131.83                        | 0.9787             | 128.87                        | 0.9754             | 138.45                        | 0.9747            |
| 0.30              | 135.78                        | 0.9794             | 132.84                        | 0.9763             | 141.51                        | 0.9728            |
| 0.35              | 136.18                        | 0.9745             | 133.08                        | 0.9706             | 140.36                        | 0.9739            |
| 0.40              | 137.97                        | 0.9783             | 134.89                        | 0.9750             | 138.31                        | 0.9833            |
| 0.45              | 138.57                        | 0.9817             | 135.38                        | 0.9789             | 135.45                        | 0.9855            |
| 0.50              | 137.87                        | 0.9831             | 134.50                        | 0.9804             | 135.05                        | 0.9863            |
| 0.55              | 138.68                        | 0.9847             | 135.27                        | 0.9822             | 136.20                        | 0.9855            |
| 0.60              | 138.68                        | 0.9847             | 135.18                        | 0.9821             | 140.88                        | 0.9858            |
| 0.65              | 137.56                        | 0.9845             | 133.97                        | 0.9820             | 144.33                        | 0.9852            |
| 0.70              | 137.56                        | 0.9845             | 133.87                        | 0.9819             | 147.23                        | 0.9831            |
| 0.75              | 137.56                        | 0.9845             | 133.80                        | 0.9818             | 152.88                        | 0.9815            |
| <b>Average</b>    | 136.56                        |                    | 133.50                        |                    | 138.38                        |                   |
| <b>%Variation</b> | 11.82                         | <b>Single-Step</b> | 13.03                         | <b>Single-Step</b> | 22.30                         | <b>Multi-Step</b> |

**Table S8.** Arrhenius reaction rate constants calculated for each biomass from  $A_\alpha$  and  $E_\alpha$  pairs.

| $\alpha$ | Arrhenius reaction rate constant, $k(T)$ [min <sup>-1</sup> ] |        |        |        |        |
|----------|---------------------------------------------------------------|--------|--------|--------|--------|
|          | PR                                                            | NO     | EN     | EC     | ND     |
| 0.05     | 0.0290                                                        | 0.0743 | 0.0807 | 0.0534 | 0.0381 |
| 0.10     | 0.1103                                                        | 0.1306 | 0.1550 | 0.1023 | 0.0678 |
| 0.15     | 0.2452                                                        | 0.1975 | 0.2284 | 0.1598 | 0.0996 |
| 0.20     | 0.3963                                                        | 0.2916 | 0.3364 | 0.2524 | 0.1380 |
| 0.25     | 0.5828                                                        | 0.3939 | 0.5115 | 0.4017 | 0.1971 |
| 0.30     | 0.8144                                                        | 0.5710 | 0.8498 | 0.6099 | 0.2934 |
| 0.35     | 1.1629                                                        | 0.8334 | 1.2649 | 0.9335 | 0.4697 |
| 0.40     | 1.5955                                                        | 1.2400 | 1.7083 | 1.3655 | 0.7207 |
| 0.45     | 2.0957                                                        | 1.7810 | 2.1875 | 1.8761 | 1.0853 |
| 0.50     | 2.6805                                                        | 2.4115 | 2.7162 | 2.4035 | 1.5123 |
| 0.55     | 3.3442                                                        | 3.1237 | 3.2959 | 2.9393 | 1.9601 |
| 0.60     | 4.1053                                                        | 3.8955 | 3.9210 | 3.4928 | 2.3643 |
| 0.65     | 4.9376                                                        | 4.7310 | 4.7019 | 4.1398 | 2.9296 |
| 0.70     | 6.0075                                                        | 5.7335 | 5.6704 | 4.9274 | 3.6348 |
| 0.75     | 7.3679                                                        | 7.1355 | 7.2018 | 6.0177 | 4.8532 |

**Table S9.** Main pyrolytic products grouped by families [% Area] at lab-scale.

| Family                       | PR   | NO   | EN   | EC   | ND   |
|------------------------------|------|------|------|------|------|
| Alcohols                     | 0.0  | 9.4  | 2.4  | 3.0  | 6.0  |
| Aldehydes                    | 1.0  | 1.4  | 0.6  | 2.3  | 0.6  |
| Anhydro sugars               | 7.8  | 3.4  | 6.7  | 1.8  | 5.7  |
| Carboxilic acids             | 13.0 | 6.9  | 20.7 | 17.1 | 17.1 |
| Esters                       | 2.2  | 2.1  | 2.0  | 1.1  | 1.2  |
| Ethers                       | 0.0  | 0.0  | 0.0  | 0.1  | 0.6  |
| Furan derivatives            | 13.4 | 7.0  | 11.5 | 6.5  | 5.5  |
| Hydrocarbons                 | 0.3  | 3.8  | 0.6  | 1.8  | 3.0  |
| Ketones                      | 6.9  | 10.0 | 12.0 | 11.6 | 11.0 |
| Nitro-compounds              | 0.8  | 1.4  | 1.3  | 1.5  | 1.7  |
| Oxo-compounds                | 1.3  | 2.2  | 1.3  | 2.2  | 1.7  |
| Phenol derivatives (lignins) | 5.2  | 5.0  | 9.7  | 6.7  | 13.7 |
| Pyran derivatives            | 0.8  | 1.3  | 3.3  | 1.1  | 0.9  |
| Water                        | 47.2 | 46.3 | 28.0 | 43.2 | 31.1 |

**Table S10.** Main compounds identified in each family.

| Family       | Compound                                   |
|--------------|--------------------------------------------|
| Acids        | Acetic Acid                                |
|              | Propanoic acid, 2-oxo-, methyl ester       |
| Alcohols     | Acetic acid, (acetyloxy)-                  |
|              | 2-Furanmethanol                            |
| Aldehydes    | Furfural                                   |
|              | Methyl glyoxal                             |
|              | Benzaldehyde, 4-hydroxy-3,5-dimethoxy-     |
|              | 5-Hydroxymethylfurfural                    |
|              | Acetaldehyde, hydroxy-                     |
| Amines       | Succindialdehyde                           |
|              | N-Butyl-tert-butylamine                    |
|              | 2-Amino-1,3-propanediol                    |
|              | Methanamine, N-hydroxy-N-methyl-           |
| Ketones      | 1-Amino-2,6-dimethylpiperidine             |
|              | 2-propanone, 1-hydroxy-                    |
|              | 2-Cyclopenten-1-one, 2-hydroxy-            |
|              | 2(5H)-Furanone                             |
| Esters       | 1,2-Cyclopentanedione, 3-methyl-           |
|              | Propanoic acid, 2-oxo-, methyl ester       |
|              | Methyl stearate                            |
|              | Cyclopropyl carbinol                       |
|              | 1,2-Ethanediol, monoacetate                |
| Ethers       | Acetic acid ethenyl ester                  |
|              | Butane, 1,2:3,4-diepoxo-, (±)-             |
| HC_Aromatics | Benzofuran, 2,3-dihydro-                   |
|              | 3,5-Dimethoxy-4-hydroxytoluene             |
| Phenols      | Benzene, 1,2,3-trimethoxy-5-methyl-        |
|              | Phenol, 4-ethenyl-2,6-dimethoxy-           |
|              | 2-Methoxy-4-vinylphenol                    |
|              | (E)-2,6-Dimethoxy-4-(prop-1-en-1-yl)phenol |
|              | Phenol, 2,6-dimethoxy-                     |
|              | Creosol                                    |
|              | Phenol, 2-methoxy-4-(1-propenyl)-          |
|              | Phenol, 2,6-dimethoxy-4-(2-propenyl)-      |
| Sugar        | Phenol, 2-methoxy-                         |
|              | Sucrose                                    |
|              | β-D-Glucopyranose, 1,6-anhydro-            |
|              | 1,6-Anhydro-β-d-talopyranose               |
|              | d-Mannose                                  |
